# Supplementary material for: Ar-Matrix Studies of the Photochemical Reaction between CS2 and ClF: Prereactive Complexes and Bond Isomerism of the Photoproducts
Source: MDPI journal article supplement (doi:10.3390/photochem2030049), 2022-09-02
Supplement: s1 [file s1]

## Supporting Information

Ar-matrix studies of the photochemical reaction between  
CS<sub>2</sub> and ClF: pre-reactive complexes and bond  
isomerism of the photoproducts

Michelle Custodio,<sup>a</sup> Carlos O. Della Védova,<sup>a</sup> Helge Willner,<sup>b</sup>

and Rosana M. Romano<sup>a,\*</sup>

**Table S1.** Geometric parameters for the different complexes formed between CS<sub>2</sub> and ClF (distances in Å, angles in degrees) calculated using the B3LYP/6-311+G(d,p) approximation

| Molecular complex   | $r(\text{C}=\text{S1})$ | $\Delta r(\text{C}=\text{S1})^a$ | $r(\text{C}=\text{S2})$ | $\Delta r(\text{C}=\text{S2})^b$ | $r(\text{Cl}-\text{F})$ | $\Delta r(\text{Cl}-\text{F})^c$ | $r(\text{S2}\cdots\text{X})^d$ | $\alpha(\text{C}=\text{S2}\cdots\text{X})^d$ | $d_p$ [35] |
|---------------------|-------------------------|----------------------------------|-------------------------|----------------------------------|-------------------------|----------------------------------|--------------------------------|----------------------------------------------|------------|
| S=C=S $\cdots$ Cl-F | 1.5525                  | $-8.0 \times 10^{-3}$            | 1.5690                  | $8.6 \times 10^{-3}$             | 1.7104                  | 0.0316                           | 2.9411                         | 97.9                                         | 0.62       |
| S=C=S $\cdots$ F-Cl | 1.5618                  | $1.3 \times 10^{-3}$             | 1.5598                  | $-6 \times 10^{-4}$              | 1.6795                  | $6 \times 10^{-4}$               | 3.2531                         | 180.0                                        | 0.05       |

<sup>a</sup>  $\Delta r(\text{C}=\text{S1}) = r(\text{C}=\text{S1})_{\text{complex}} - r(\text{C}=\text{S1})_{\text{free}}$ . S1 corresponds to the interacting sulfur atom.

<sup>b</sup>  $\Delta r(\text{C}=\text{S2}) = r(\text{C}=\text{S2})_{\text{complex}} - r(\text{C}=\text{S2})_{\text{free}}$ . S2 corresponds to the non-interacting sulfur atom.

<sup>c</sup>  $\Delta r(\text{Cl}-\text{F}) = r(\text{Cl}-\text{F})_{\text{complex}} - r(\text{Cl}-\text{F})_{\text{free}}$ .

<sup>d</sup> X = Cl or F.

**Table S2.**  $\Delta E^{(SCF)}$ ,  $\Delta E^{CP}$ , BSSE and GEOM corrections (in kcal.mol<sup>-1</sup>), transferred charge ( $q$ ), orbital stabilization energy ( $\Delta E^{(2)}$  in kcal.mol<sup>-1</sup>) for the different complexes formed between CS<sub>2</sub> and ClF computed using the B3LYP/6-311+G(d,p) approximation

| Molecular complex | $\Delta E^{SCF}$ (kcal/mol) <sup>a</sup> | $\Delta E^{CP}$ (kcal/mol) <sup>b</sup> | BSSE (kcal/mol) <sup>c</sup> | GEOM (kcal/mol) <sup>d</sup> | $q$ (e) | $\Delta E^{(2)e}$ (kcal/mol) | Orbital interaction               |
|-------------------|------------------------------------------|-----------------------------------------|------------------------------|------------------------------|---------|------------------------------|-----------------------------------|
| S=C=S...Cl-F      | -3.48                                    | -1.89                                   | -0.33                        | -1.26                        | -0.0894 | -9.79                        | $lp_s \rightarrow \sigma^*_{ClF}$ |
| S=C=S... F-Cl     | -1.84                                    | -0.06                                   | -0.48                        | -1.30                        | -0.0013 | -0.71                        | $\sigma_{ClF} \rightarrow Ry_s$   |
|                   |                                          |                                         |                              |                              |         | -0.29                        | $lp_F \rightarrow \sigma^*_{C=S}$ |

<sup>a</sup> Uncorrected binding energy,  $\Delta E^{(SCF)} = E_{AB}^{AB}(AB) - E_A^A(A) - E_B^B(B)$ , where the subscripts refer to the geometry and the superscript refer to the bases set used to calculate the energy at the geometry defined by the subscript.

<sup>b</sup> Counterpoise corrected binding energy,  $\Delta E^{CP} = E_{AB}^{AB}(AB) - E_{AB}^{AB}(A) - E_{AB}^{AB}(B)$ .

<sup>c</sup> Basis set superposition error correction,  $BSSE = E_{AB}^{AB}(A) - E_A^A(A) + E_{AB}^{AB}(B) - E_B^B(B)$

<sup>d</sup> Geometry correction,  $GEOM = E_{AB}^A(A) - E_A^A(A) + E_{AB}^B(B) - E_B^B(B)$

<sup>e</sup> Orbital stabilization energy

**Table S3.** Wavenumbers for the different complexes formed between CS<sub>2</sub> and ClF computed with the B3LYP/6-311+G(d,p) approximation (wavenumbers are in cm<sup>-1</sup> and relative IR intensities are given between parentheses) and comparison with the experimental values

| Ar-matrix                 |                                              | B3LYP/6-311+G(d,p)        |                                              |                           |                                              | Tentative Assignment                       |
|---------------------------|----------------------------------------------|---------------------------|----------------------------------------------|---------------------------|----------------------------------------------|--------------------------------------------|
|                           |                                              | S=C=S⋯Cl-F                |                                              | S=C=S⋯ F-Cl               |                                              |                                            |
| $\nu$ (cm <sup>-1</sup> ) | $\Delta\nu$ (cm <sup>-1</sup> ) <sup>a</sup> | $\nu$ (cm <sup>-1</sup> ) | $\Delta\nu$ (cm <sup>-1</sup> ) <sup>a</sup> | $\nu$ (cm <sup>-1</sup> ) | $\Delta\nu$ (cm <sup>-1</sup> ) <sup>a</sup> |                                            |
| 2169.5                    | -8.3                                         |                           |                                              |                           |                                              | $\nu_{as}(\text{SCS}) + \nu_s(\text{SCS})$ |
| 1522.2                    | -5.7                                         | 1547.1 (100)              | -6.2                                         | 1552.2 (100)              | -1.9                                         | $\nu_{as}(\text{SCS})$                     |
|                           |                                              | 671.8 (<1)                | -2.1                                         | 673.3 (<1)                | -0.6                                         | $\nu_s(\text{SCS})$                        |
| 718.5                     | -48.6                                        | 646.5 (31.8)              | -93.3                                        | 740.3 (3.8)               | +0.7                                         | $\nu(^{35}\text{Cl-F})$                    |
| 712.2                     | -47.7                                        | 640.8 (31.8)              | -92.2                                        | 733.2 (3.7)               | +0.5                                         | $\nu(^{37}\text{Cl-F})$                    |
|                           |                                              | 403.3 (<1)                | +5.7                                         | 398.7 (2.6)               | +1.1                                         | $\delta_{i.p.}(\text{SCS})$                |
|                           |                                              | 393.3 (<1)                | -4.2                                         | 398.7 (2.6)               | +1.1                                         | $\delta_{o.o.p.}(\text{SCS})$              |
|                           |                                              | 137.2 (<1)                |                                              | 71.0 (<1)                 |                                              |                                            |
|                           |                                              | 107.6 (<1)                |                                              | 71.0 (<1)                 |                                              |                                            |
|                           |                                              | 92.6 (2.2)                |                                              | 21.7 (<1)                 |                                              |                                            |
|                           |                                              | 34.4 (<1)                 |                                              | 17.5 (<1)                 |                                              |                                            |
|                           |                                              |                           |                                              | 17.5 (<1)                 |                                              |                                            |

<sup>a</sup>  $\Delta\nu = \nu_{\text{complex}} - \nu_{\text{monomer}}$

**Table S4.** Geometrical parameters of anti-CIC(S)SF, syn-CIC(S)SF, anti-FC(S)SCI and syn-FC(S)SCI calculated with the B3LYP/6-311+G(d,p) approximation (distances in Å and angles in degrees)

| Geometrical Parameters | anti-CIC(S)SF  | syn-CIC(S)SF   | anti-FC(S)SCI  | syn-FC(S)SCI   |
|------------------------|----------------|----------------|----------------|----------------|
| r (X–C)                | 1.7414         | 1.7916         | 1.3304         | 1.3567         |
| r (C=S)                | 1.6267         | 1.6042         | 1.6172         | 1.6014         |
| r (C–S)                | 1.7220         | 1.7376         | 1.7360         | 1.7679         |
| r (S–Y)                | 1.6713         | 1.6480         | 2.1006         | 2.0574         |
| $\alpha$ (X–C=S)       | 126.6          | 125.7          | 124.8          | 123.6          |
| $\alpha$ (X–C–S)       | 118.5          | 104.0          | 116.3          | 103.2          |
| $\alpha$ (C–S–Y)       | 105.3          | 101.1          | 106.4          | 102.9          |
| $\tau$ (X–C–S–Y)       | 0.0            | 180.0          | 0.0            | 180.0          |
| E (Hartree)            | –1394.59816341 | –1394.59694854 | –1394.61707083 | –1394.61363235 |
| $\Delta E$ (Kcal/mol)  | 0.00           | 0.76           | 0.00           | 2.16           |

**Table S5** FTIR wavenumber and proposed assignment of the photoproducts formed by UV-visible irradiation of CS<sub>2</sub> and ClF co-deposited in an Ar matrix (CS<sub>2</sub>:ClF:Ar 1:2:200) at cryogenic temperatures

| Wavenumber<br>$\nu$ (cm <sup>-1</sup> ) | Proposed Assignment    |                                                        | Reported Wavenumber<br>$\nu$ (cm <sup>-1</sup> ) |
|-----------------------------------------|------------------------|--------------------------------------------------------|--------------------------------------------------|
|                                         | Species                | Description                                            |                                                  |
| 1481.9                                  | Cl <sup>•</sup> ...SCS | $\nu_{as}$ S=C=S                                       | 1481.5 [5]                                       |
| 1353.6}<br>1346.0}                      | SCF <sub>2</sub>       | $\nu$ C=S                                              | 1354.0 [25]                                      |
| 1287.5}<br>1284.0}<br>1281.3}           | complexed-CS           | $\nu$ CS                                               | 1276 [29]                                        |
| 1228.9}<br>1226.0}                      | syn-FC(S)SCI           | $\nu$ C=S                                              | This work                                        |
| 1213.5}<br>1208.2}                      | anti-FC(S)SCI          | $\nu$ C=S                                              | This work                                        |
| 1185.3}<br>1182.2}<br>1179.3}           | SCF <sub>2</sub>       | $\nu_{as}$ F-C-F                                       | 1180 [25]                                        |
| 1160.9                                  | syn-ClC(S)SF           | $\nu$ C=S                                              | This work                                        |
| 1061.8                                  | anti-ClC(S)SF          | $\nu$ C=S                                              | This work                                        |
| 997.5                                   | anti-FC(S)SCI          | $\nu$ C-F                                              | This work                                        |
| 976.3                                   | syn-FC(S)SCI           | $\nu$ C-F                                              | This work                                        |
| 802.7                                   | anti-ClC(S)SF          | $\nu$ C-Cl                                             | This work                                        |
| 782.2}<br>779.2}                        | syn-ClC(S)SF           | $\nu$ S-F                                              | This work                                        |
| 668.8                                   | anti-ClC(S)SF          | $\nu$ S-F                                              | This work                                        |
| 598.8}<br>595.7}                        | <sup>•</sup> SCI       | $\nu$ S- <sup>35</sup> Cl<br>$\nu$ S- <sup>37</sup> Cl | 574.4}<br>566.9} [30]                            |

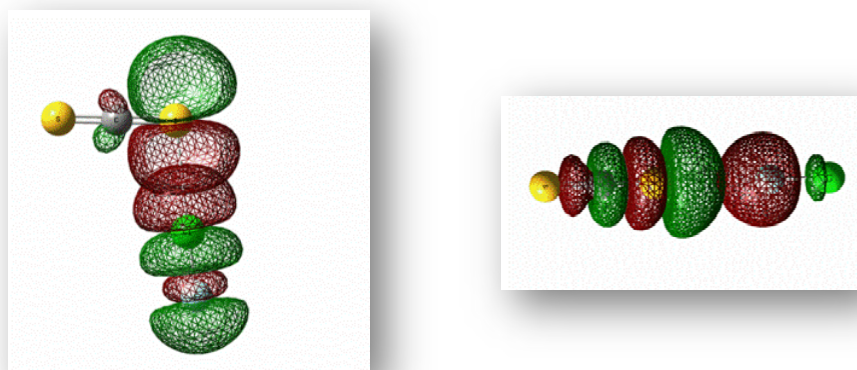

**Figure S1.** Schematic representations of the main contributions to the orbital interactions in the  $\text{CS}_2 \cdots \text{CIF}$  (left) and  $\text{CS}_2 \cdots \text{FCl}$  (right) complexes.

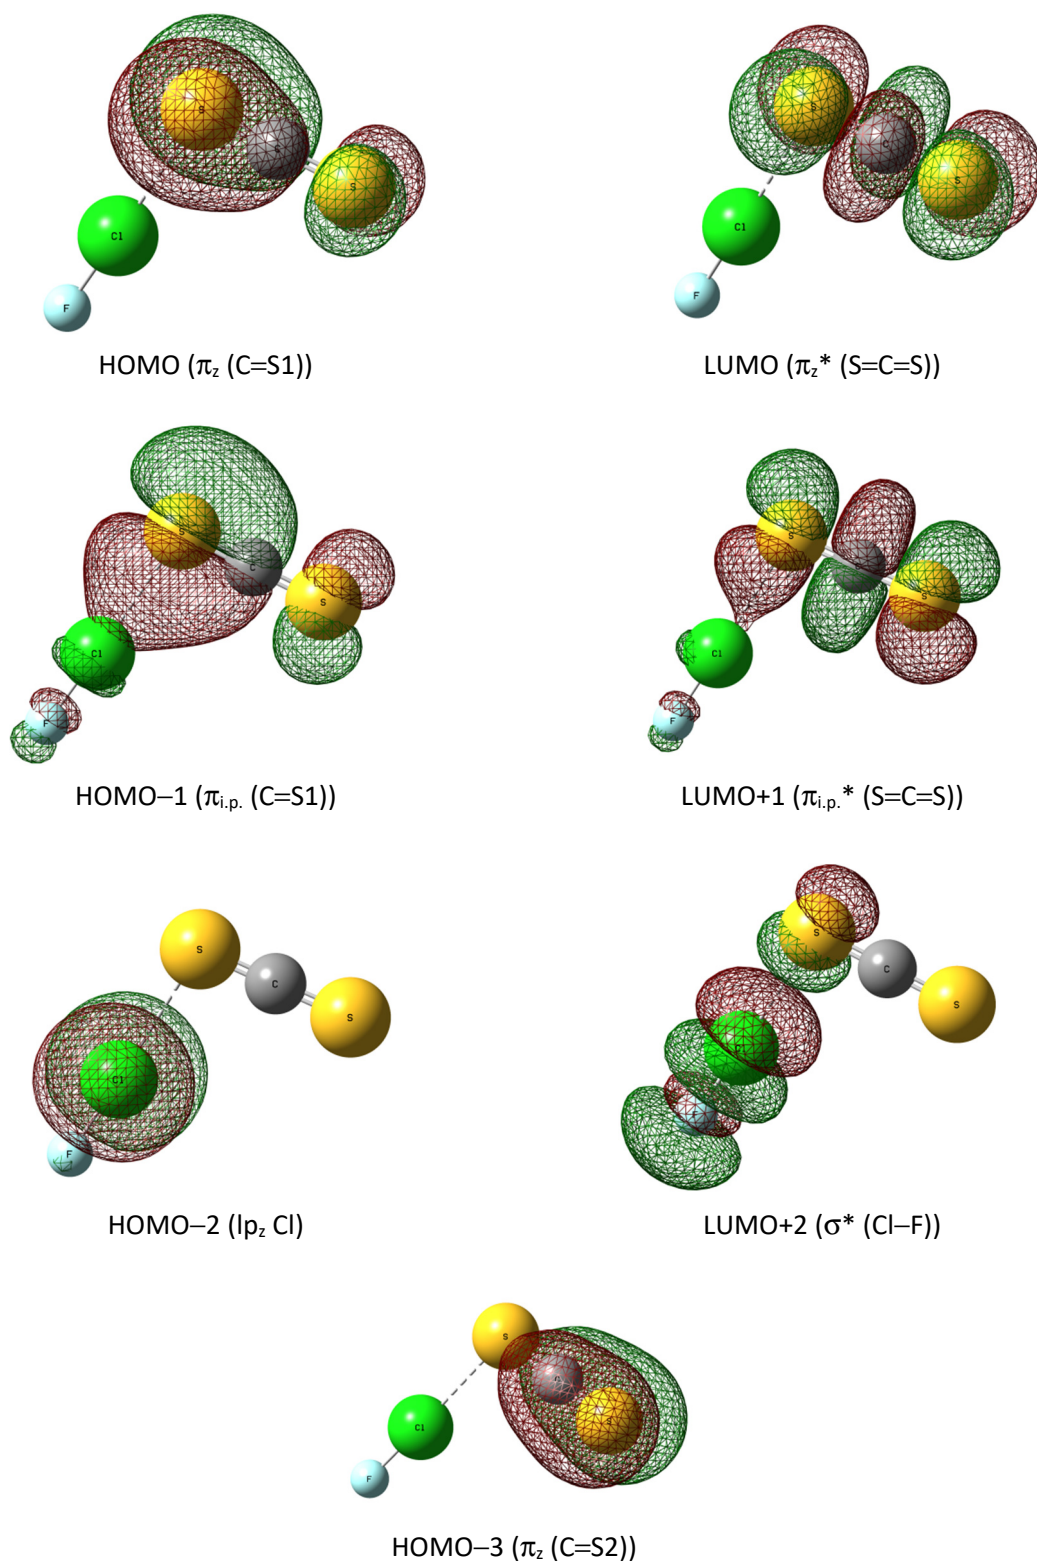

**Figure S2.** Schematic representation and approximate assignment of the molecular orbitals of the  $\text{CS}_2 \cdots \text{ClF}$  complex involved in the electronic transitions with  $\lambda > 200$  nm and  $f \geq 0.002$ , calculated with the B3LYP/6-311+G(d,p) approximation.

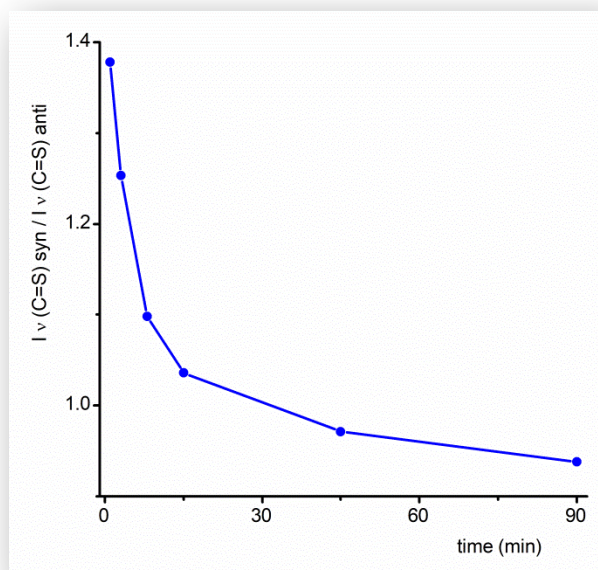

**Figure S3.** Plot of the relative intensities of the  $\nu(\text{C}=\text{S})$  absorptions of *syn*- and *anti*-CIC(S)SF as a function of the broad-band UV-visible irradiation time.

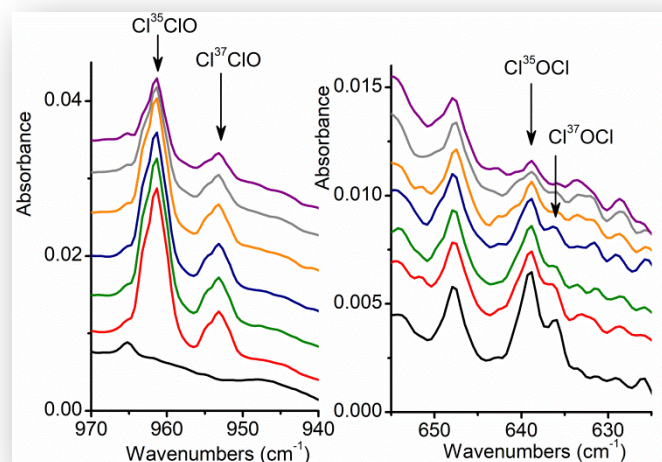

**Figure S4.** FTIR spectra of the CS<sub>2</sub>/ClF/Ar matrix (CS<sub>2</sub>:ClF:Ar = 1:2:200) at about 15 K after deposition (bottom, black-trace) and (from bottom to top) 1 (red-trace), 3 (green-trace), 8 minutes (blue-trace), 15 minutes (orange-trace), 45 minutes (grey-trace) and 90 minutes (purple-trace) of irradiation with broad-band UV-visible light ( $225 \leq \lambda \leq 800$  nm) in the 970–940 and 655–635 cm<sup>-1</sup> regions.

5 Tobón, Y. A.; Romano, R. M.; Della Védova, C. O.; Downs, A. J. Formation of New Halogenotiocarbonylsulphenyl Halides, XC(S)SY, through Photochemical Matrix Reactions Starting from CS<sub>2</sub> and Dihalogen Molecule XY (XY= Cl<sub>2</sub>, Br<sub>2</sub>, or BrCl). *Inorg. Chem.* **2007**, *46*, 4692-4703.

25 Haas, A.; Willner, H.; Bürger, H.; Pawelke, G. Matrix-infrarot-Spektren und Kraftkonstanten von SCF<sub>2</sub> und SeCF<sub>2</sub>. *Spectrochim. Acta*, **1977**, *33 A*, 937-945.;

29 Jacox, M. E. Milligan, D. E. *J. Mol. Spectrosc.* **1975**, *58*, 142–157.;

30 Willner, H. Die Infrarotabsorption des matrixisolierten SCI-Radikal. *Spectrochim. Acta*. **1981**, *37 A*, 405-406.

35 Calculated van der Waals penetration distance,  $d_p = (\sum r_{vdW} - r_{eq.})$ ; van der Waals radii taken from Bondi, A. Van der Waals volumes and radii. *J. Phys. Chem.* **1964**, *68*, 441–451.
